# Supplementary material
Source: PubMed Central journal article supplement (PMC3604718)
Supplement: emboj201323s2.pdf [file emboj201323s2.pdf]

Manuscript EMBO-2012-82823

## Signal recognition initiates reorganization of the presequence translocase during protein import

Oleksandr Lytovchenko, Jonathan Melin, Christian Schulz, Markus Kilisch, Dana P Hutu and Peter Rehling

*Corresponding author: Peter Rehling, University of Göttingen*

---

### Review timeline:

|                     |                   |
|---------------------|-------------------|
| Submission date:    | 30 July 2012      |
| Editorial Decision: | 11 September 2012 |
| Revision received:  | 19 December 2012  |
| Accepted:           | 17 January 2013   |

---

No Peer Review Process File is available with this article, as the authors have chosen not to make the review process public in this case.
